# Supplementary material
Source: ML conference proceedings conference paper supplement (https://proceedings.mlr.press/v139/wong21a.html)
Supplement: Supplementary file [file wong21a-supp.pdf]

---

# Supplemental: Leveraging Language to Learn Program Search Heuristics and Abstractions

---

This contains the supplemental appendix to the 2021 ICML paper. It is organized sequentially in reference to the main text; S{N} refers back to section N in the main text.

A complete release of code for our implementation, including command line scripts to replicate the experiments in the paper and links to the datasets, can be found at: <https://bit.ly/3g9361W>.

## S4. Base learning algorithm: DreamCoder

The LAPS framework described in the main paper (Sec. 5) is a general one for extending Bayesian models of program learning to incorporate information from natural language (see (Liang et al., 2010; Lake et al., 2015; Dechter et al., 2013; Lake et al., 2013)). Our concrete implementation and experiments use the DreamCoder approach of (Ellis et al., 2021; 2018) as the base synthesis algorithm, which implements the hierarchical Bayesian formulation of program learning. It defines a modular interface with two primary learning components: a learned *conditional inference* model for search (as a neural search heuristic); and a learned *abstraction* algorithm for updating the program prior (based on program refactoring and compression) (Ellis et al., 2021). Each of these learning components has been additionally implemented in other work (such as (Devlin et al., 2017; Polosukhin & Skidanov, 2018; Nye et al., 2019; Parisotto et al., 2016; Balog et al., 2016) for neurally guided synthesis, and (Dechter et al., 2013; Zhang et al., 2017; Shin et al., 2019; Artzi et al., 2014; Dumancić & Cropper) for program abstraction learning).

This supplementary section provides theoretical and implementation details on the DreamCoder algorithm we use in our experiments (summarized in Sec. 4). We match our implementation as closely as possible to the original work for comparison with published baselines. We provide key details relevant to the language-guided extension, but strongly recommend the original works which introduce the DreamCoder algorithm (Ellis et al., 2021; 2018) for further reference.

### S4.1 Program prior and MDL equivalence

Hierarchical Bayesian program learning formulations require a prior over expressible programs. DreamCoder is learned iteratively: it is initialized with a base library  $\mathcal{L}_0$  and returns a library  $\mathcal{L}_f$  containing program abstractions learned from solving training tasks. Therefore, DreamCoder defines its program prior with respect to the current library  $\mathcal{L}_i$  maintained at each iteration. This is pa-

rameterized as a simple PCFG  $P[\rho|\mathcal{L}, \theta_{\mathcal{L}}]$  whose productions are of the form  $l_i \rightarrow l_j \in \mathcal{L}$ , each with a real-valued weight  $\theta_{\mathcal{L}l}$ , where the probability of a program  $\rho$  is given by  $P[\rho|\mathcal{L}, \theta_{\mathcal{L}}] = \prod_{l \in \rho} P[l|\mathcal{L}, \theta_{\mathcal{L}}]$  (Sec. 4.1).

Minor complexity arises in order to support typing (Pierce, 2002): following (Ellis et al., 2018), the library  $\mathcal{L}_i$  is implemented as a set of polymorphically typed  $\lambda$ -calculus expressions. The only change this produces to the original prior definition is to restrict the set of possible productions under the PCFG: that is, permissible productions are of the form  $l_i \rightarrow l_j \in \{\mathcal{L} | l_i \rightarrow l_j \text{ is well typed}\}$ . The prior probabilities of programs are therefore calculated with respect to the set of well-typed productions.

As discussed in the main paper, this prior definition is *equivalent to a minimum description-length prior over programs* under  $(\mathcal{L}, \theta_{\mathcal{L}})$  when all  $\theta_{\mathcal{L}} < 1.0$ , as the product of additional productions in an expression will strictly decrease as the number of productions in an expression increases.

### S4.2 Amortized conditional inference

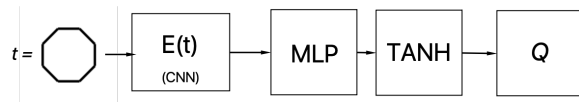

Figure 1. Architecture of the neural model  $Q_i(\rho|t, \mathcal{L}_i)$ . The model takes as input task examples  $t$ . These are encoded using a domain-specific encoder  $E(t)$ . Task encodings feed to an MLP and activation layer and output a tensor  $Q$ . This parameterizes a distribution over program bigrams in the final DSL, which defines a conditional distribution from which to enumerate programs during search.

To identify programs that solve tasks  $t$  while obtaining high probability under  $P[\rho|\mathcal{L}, \theta_{\mathcal{L}}]$ , DreamCoder trains a neural search heuristic  $Q_i(\rho|t, \mathcal{L}_i)$  at each iteration  $i$  to approximate the inverse model.

The training procedure in (Ellis et al., 2021) (summarized in Sec. 4.2) is a key contribution of the original work for learning in the distant supervision setting. The model is trained on samples from the generative prior (providing an endless

training stream of random synthesis tasks); and this procedure should generalize immediately to any neural model for predicting programs conditioned on the task specification (e.g. (Devlin et al., 2017; Polosukhin & Skidanov, 2018; Nye et al., 2019; Parisotto et al., 2016; Balog et al., 2016)). The model is also supervised on any original training task examples and their program solutions discovered during learning.

In our experiments we use the baseline neural model architecture in (Ellis et al., 2021). This is parameterized by two modular components:

1. A *domain-specific task encoder*  $E(t)$ . This encodes the task examples (e.g. *images* in the graphics program domain, or input-output strings in the text editing domain) that are input to the neural model. This task encoder architecture is defined domain-specifically based on the form of the task examples (e.g. a CNN for the graphics domain). It outputs a fixed dimensional embedding for any given task as *input* to the model. In our experiments this is a 64-dimensional embedding across all domains (See S6.1 for domain-specific architectures; and released code.)
2. A *conditional model over programs*  $Q(\rho|E(t))$ . This component receives the task encoding as input and outputs a distribution over programs. Following (Ellis et al., 2021), this is a 2-layer fully-connected MLP (with 64 hidden units and a final tanh activation layer) that outputs a fixed-dimensional real-valued tensor encoding a distribution over programs in the library  $\mathcal{L}$  as output. The real-valued tensor corresponds to weights over program primitives conditioned on their local context in the syntax tree of the program, consisting of the parent node in the syntax tree and which argument is being generated. This functions as a ‘bigram transition model’ over trees that encodes the likelihood of transitions from one primitive to the next.  $Q$  returns this as a  $(|\mathcal{L}| + 1) \times (|\mathcal{L}| + 2) \times A$ -dimensional tensor, where  $A$  is the maximum arity of any primitive in the library.

This parameterization supports fast sampling of programs during conditional synthesis: the neural model runs once per task (to encode the task examples and produce the bigram transition model) and the resulting parameterization can then be used to sample programs during synthesis (e.g. by enumerating programs by expanding trees (as ‘bigrams’ over parent and children primitives) ranked in order of their likelihood starting from the program root.)

Following (Ellis et al., 2021), the neural model is trained to optimize the following MAP inference objective on the

training tasks and the sampled tasks from the prior:

$$\mathcal{L} \text{ MAP} = E_{t \sim (\mathcal{L}, \theta_{\mathcal{L}})} \left[ \log Q \left( \arg \max_{\rho} P[\rho|t, \mathcal{L}, \theta_{\mathcal{L}}] \mid t \right) \right] \quad (1)$$

### S4.3 Abstraction learning as program compression

DreamCoder learns new abstractions to approximately optimize for Eq. 2 (main paper), which infers an optimal library and parameters with respect to the observed programs on the training tasks.

The DreamCoder abstraction algorithm is a primary contribution of the original work in (Ellis et al., 2021), and is discussed extensively in (Ellis et al., 2021). We therefore provide additional technical details here that are relevant to its integration with LAPS in our experiments, but strongly encourage referencing (Ellis et al., 2021) for the full implementation.

As discussed in (Ellis et al., 2021) and our main work, DreamCoder approaches abstraction using an equivalence between Eq. 3 and the *minimum description length* of the *prior* (as the description length of the library) and the *programs* produced from the prior (under the PCFG definition of the prior). Therefore, in practice, inferring the optimal library is equivalent to inferring the library which maximally compresses the description length of the library and the description length of programs which explain the training tasks. In particular, DreamCoder optimizes the following compression objective with respect to the training tasks  $T$  and the finite *beam*  $B_t$  of program solutions discovered for each training task during learning:

$$\log P[\mathcal{L}] + \arg \max_{\theta_{\mathcal{L}}} \sum_{t \in T} \log \sum_{\rho \in B_t} P[t|\rho] \max_{\rho' \in \rho} P[\rho'|\mathcal{L}, \theta_{\mathcal{L}}] + \log P[\theta_{\mathcal{L}}|\mathcal{L}] - |\theta_{\mathcal{L}}|_0 \quad (2)$$

The key aspect of this algorithm is that it considers abstractions which compress not only the programs as they are *currently written*, but any semantically equivalent *refactorings* of these programs. Specifically, as programs are written in a  $\lambda$ -calculus, *refactoring* refers to any program which is equivalent up to  $\beta$ -reduction (i.e., function application/variable substitution (Pierce, 2002)). A primary contribution of the original work in (Ellis et al., 2021) is an efficient algorithm for computing these refactorings that is unchanged when we integrate language; we refer to the original text for details.

In our work, the primary important aspect of this aspect is that refactorings are defined compositionally over the existing program primitives. Specifically, refactorings can be efficiently calculated according to semantic equivalences in the the  $\lambda$ -calculus (namely, that function application and variable substitution guarantee that the resulting refactored programs are equivalent. *Abstractions* created by variable

substitution will always be composed of subcomponents from the initial library.) We take advantage of this compositionality when defining our joint abstraction algorithm over natural language. Defining an initial *compositional* translation model between language and the program components ensures that we can approximate compression in the joint model after the programs are refactored, without needing to induce an entirely new translation model over language and the refactored programs.

## S5. Our Approach: Language for Abstraction and Program Search

This section now describes technical details for the concrete LAPS implementation in our reported experiments, which is defined over the DreamCoder implementation. We structure this section according to the parallel implementations in the base algorithm for clarity. However, except for the specifics of the joint-abstraction algorithm, the technical implementation of each component should extend directly to most other similar learned synthesis algorithms (e.g. the joint model implementation should be reusable in *any* synthesis algorithm that uses an explicit symbolic library of primitives.)

### S5.1 Joint prior over programs and language

LAPS extends the prior  $P[\rho]$  over programs under the library to a *joint* prior  $J(\rho, d_t)$  over programs for a given task and their natural language descriptions  $d_t$  (Sec. 5.1). We formulate this prior as

$$J(\rho, d_t) = P[\rho|\mathcal{L}, \theta_{\mathcal{L}}]P[d_t|\rho, \mathcal{L}]$$

the product of the original prior over programs  $P[\rho|\mathcal{L}, \theta_{\mathcal{L}}]$  defined on the program library, and a *program to descriptions* “translation” model  $\mathcal{T}(d_t|\rho, \mathcal{L}) \approx P[d_t|\rho, \mathcal{L}]$  that describes how descriptions are generated for programs written in the library.

The concrete implementation described in the main paper uses a translation model that additionally decomposes compositionally over language and programs—in particular, on the basis of token-token translation distributions  $P_{\mathcal{T}}[w|l]$  between words  $w \in d_t$  and  $l \in \mathcal{L}$ . Many available translation and semantic parsing models (such as synchronous grammars over natural language and programs) preserve this further compositional requirement (e.g. (Artzi et al., 2014; Wong & Mooney, 2006)).

See Figure S3 (supplement) for example samples from the generative model on the graphics domain at earlier and later stages of training.

Our implementation uses a classical statistical machine translation model (the Model 4 version of the IBM Statis-

tical Machine Translation models (Gal & Blunsom, 2013)) whose parameters can be tractably estimated from very few paired programs and descriptions (in the distant supervision setting used in the original work, there may be no more than a couple of hundred training tasks in the full dataset, and fewer than 10 solved tasks on which to train the translation model at any given time.) In addition to inference in small data settings, this translation model has a fully compositional generative definition (Gal & Blunsom, 2013) that allows it to be easily used to train the neural amortized inference model which conditions on language.

Despite this, however, this translation model (and the further inductive biases used to specifically relate program trees to sentences) make strong compositionality assumptions about the relationship between program primitives and words as a joint generative model of programs and language; we find that these inductive biases are useful in the small data setting and produce empirically successful results. However, this is likely because of *how* the joint model is used during training, which does not require a perfect generative model of language (or language with respect to programs) for either amortizing inference or abstraction in order to use language as a heuristic during learning.

A full definition of the statistical translation model we use can be found in (Gal & Blunsom, 2013). We re-summarize important details here. The IBM family of translation models estimates the conditional token-token probabilities  $P_{\mathcal{T}}[w|l]$  on the basis of *alignment* variables  $a_{i,d}$ , which specify a direct correspondence between tokens in parallel texts (e.g. a word in a task description and a program primitive.) These alignments are *many:many* between tokens in programs and natural language sentences – a given word can correspond to multiple primitives, and vice versa. Conditioned on a set of *alignments* from paired programs and descriptions, the conditional probabilities in *both* directions (the probability of generating a program primitive in a program based on the presence of a word in a sentence, and vice versa) are defined by marginalizing over the alignment variables. We provide one direction ( $P_{\mathcal{T}}[w|l]$ ), as the other is symmetrical:

$$P_{\mathcal{T}}[w|l] \propto \sum_{a_1} \dots \sum_{a_m} P[w, a_1 \dots a_m | l] \propto \prod_{i=1}^m q(a_i | i, l, m)$$

where  $a_i$  are alignment variables inferred over a paired corpus and  $q(j|i, l, m)$  can be interpreted as the probability of alignment variable  $a_i$  (for the token with index  $i$  in a program) taking value  $j$  (where  $j$  is an index into the corresponding sentence) conditioned on the lengths  $l$  and  $m$  of the program and natural language sentence (Gal & Blunsom, 2013).

These alignments are inferred by approximately inverting the generative model in (Gal & Blunsom, 2013) to maxi-

165 mize the likelihood of the observed paired sentences and  
 166 programs. One implementation detail: the alignment algo-  
 167 rithm operates over pairs of strings. For convenience we  
 168 infer alignments between sentences and linearized token  
 169 sequences in the program tree (which can be done with com-  
 170 plete recoverability of the original program tree (Andreas  
 171 et al., 2013)). This is another inductive assumption that we  
 172 choose after preliminary experimentation and find that our  
 173 implementation yields strong empirical results regardless.

174 The IBM translation model is a noisy-channel generative  
 175 model that requires an additional language model  $p(d)$   
 176 to generate language (Gal & Blunsom, 2013; Heafield, 2011).  
 177 We use an efficient parallelized implementation for inferring  
 178 the translation model parameters from (Koehn et al., 2007),  
 179 which also contains a basic language model inference  
 180 algorithm inferred over the full corpus of training task  
 181 sentences (as a trigram model, which we again find simple  
 182 but effective for our very small data setting). Specific model  
 183 hyperparameters for all experiments are available in the  
 184 released code repo (in the experiment runtime commands.)  
 185

187 **Mutual exclusivity:** Section 5.1 of the main paper also  
 188 describes how the joint model can be modified to include  
 189 language-specific priors, such as a simple implementation  
 190 of the well-known **mutual exclusivity** prior documented  
 191 in the cognitive language-learning literature (Markman &  
 192 Wachtel, 1988; Gandhi & Lake, 2019) and given a Bayesian  
 193 formulation in (Frank et al., 2009). We provide an imple-  
 194 mentation to demonstrate that the joint model can be easily  
 195 extended: specifically, a simple mutual exclusivity assump-  
 196 tion can be added into the joint model by simply updating  
 197 the compositional translation model to include additional  
 198 distributions  $t_{ME}(d_{new}|l)$  where  $d_{new}$  are words that *only*  
 199 appear in unsolved training tasks and

$$201 \quad t_{ME}(d_{new}|l) \propto \alpha P[l|\mathcal{L}, \theta_{\mathcal{L}}]^{-1}$$

204 new words are now assumed to correspond to primitives *in-*  
 205 *versely* proportional to their current usage under the learned  
 206 program prior. As we show in the next section, incorporat-  
 207 ing this prior at the level of the joint model can be used to  
 208 approximate mutual exclusivity assumptions in the learned  
 209 search heuristic, encouraging exploration in the presence of  
 210 new words.

211 Practically, we calculate the mutual exclusivity prior in our  
 212 concrete implementation by leveraging the *alignments* upon  
 213 which our token-token translation probabilities are defined.  
 214 Specifically, we add *pseudoalignments* between each  $d_{new}$   
 215 and each  $l \propto \alpha P[l|\mathcal{L}, \theta_{\mathcal{L}}]^{-1}$ ; when the token-token transla-  
 216 tion probabilities marginalize over the latent alignments and  
 217 these pseudo alignments, the resulting translation probabili-  
 218 ties encode the mutual exclusivity prior.  
 219

## S5.2 Integrating the joint model into amortized conditional search

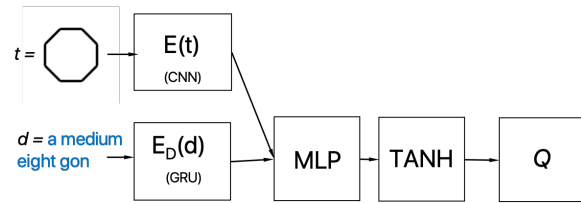

Figure 2. Architecture of the language-conditioned neural model  $Q(\rho|d, t)$ . The model takes as input task examples  $t$ . These are encoded using a domain-specific encoder  $E(t)$ . The model additionally takes in task descriptions  $d$ , encoded using a language encoder  $E_D(t)$  (implemented as a GRU). Task encodings are concatenated and feed to an MLP and activation layer and output a tensor  $Q$ . This parameterizes a distribution over program bigrams in the final DSL, which defines a conditional distribution from which to enumerate programs during search.

The amortized conditional inference model  $Q(\rho|t)$  (Sec. 4.2) extends straightforwardly in LAPS to condition on language  $Q(\rho|d, t)$  (Sec. 5.2). Importantly, the training procedure in Sec. 4.2 (training the neural model on samples from the prior) also extends to the language-enriched condition (training the neural model on samples from the joint prior, which include generated language annotations.)

In our experiments we implement the concrete neural model  $Q(\rho|d, t)$  in our experiments by extending modularly on the original model in (Ellis et al., 2021) (and in the supplemental S4.2) for direct comparison. Our full architecture therefore has *three* modular components to additionally condition on language:

1. A natural language task descriptions encoder  $E_D(d)$ . This receives the task description  $d$  as input. We implement this as an RNN model using a bidirectional GRU (Cho et al., 2014) with 64 hidden units; we embed natural language symbols as 64-dimensional vectors, and randomly initialize and backpropagate through the embedding during training. We tokenize the sentences in  $u$  on whitespace and concatenate each sentence, delimited by special start and end of sentence tokens. At test time, we replace any OOV tokens with a special UNK token.
2. A domain-specific task encoder  $E(t)$ , following S4.2.
3. A bigram transition model over program primitives, following S4.2. To condition jointly on  $E_D(d)$  and  $E(t)$  we simply concatenate these two embeddings and update the first layer of the MLP to take the 128-dimensional concatenated embeddings as input.



### 5.3 Abstraction learning as joint model compression

Finally, the *abstraction learning* model in (Ellis et al., 2021) can also be generalized to condition on language, by extending the optimal library inference algorithm with respect to the program prior to an optimal library inference algorithm with respect to the joint model over language and programs (Eq. 6 and 7, main text.)

In our concrete implementation with respect to the DreamCoder algorithm, this means extending the description-length compression objective – originally defined over the program library and training task programs – to include the translation model definition. The main paper defines a description-length prior over the compositional translation model (Eq. 10). Optimizing this tractably requires redefining the abstraction algorithm in (Ellis et al., 2021) – which refactors  $\lambda$ -calculus programs via *lambda*-abstraction (see S4.3 for a summary) – to also jointly re-estimate the description length of the translation model  $\mathcal{T}(d_t|\rho, \mathcal{L}')$  using the refactored programs under the new candidate library  $\mathcal{L}'$ .

We implement an efficient approximation that can be calculated with respect to the classical statistical translation model described in S4.1 (Gal & Blunsom, 2013). In particular, we leverage the *alignment*-based definition (which uses latent correspondences inferred between program tokens and sentence tokens in paired programs and descriptions) to approximate  $-H(\mathbb{P}_{\mathcal{T}}[w|l]) = -\log(\mathbb{P}_{\mathcal{T}}[w|l])$ , the entropy of the token-token translation probabilities.

Specifically, as the IBM model defines the conditional token-token probabilities

$$\mathbb{P}_{\mathcal{T}}[w|l] \propto \sum_{a_1} \dots \sum_{a_m} \mathbb{P}[w, a_1 \dots a_m | l]$$

marginalized over alignments, where (slightly abusing notation) in any given paired program and sentence description we will have estimated a set of alignments  $a_{w_j, l_k \dots l_n}$  between the  $j$ -th token in the description corresponding to one or more tokens  $l_k \dots l_n$  in the paired program. We therefore define the *description*-length of each token-token translation as the sum of the description lengths of the alignments which express it under a library  $\mathcal{L}$ :

$$\sum_{a_i} \dots \sum_{a_m} \mathbb{P}[d, a_1 \dots a_m | l, \mathcal{L}] \propto \sum_{a_1} \dots \sum_{a_m} |a_i|_{\mathcal{L}}$$

and the description lengths under the *refactored* library  $\mathcal{L}'$  containing new abstractions compresses according to

$$|a'_{w_j, l'_k \dots l'_n}|_{\mathcal{L}'} < |a'_{w_j, l_k \dots l_n}|_{\mathcal{L}} \iff \{l'_i \text{ contains only } l_k \dots l_n \text{ as subcomponents} | l'_k \dots l'_n\} \quad (3)$$

and we say that a primitive  $l \in \mathcal{L}$  is a *subcomponent* of a refactored abstraction  $l \in \mathcal{L}$  if the abstraction can be

$\beta$ -reduced such that  $l$  appears in it. That is, a refactored alignment  $a' : w_i \rightarrow \{l' \dots l_n\}$  is compressed only when a new abstraction  $l'$  encapsulates over a strict subset of the constituent program primitives already aligned to the word in the original alignment. This allows us to re-approximate the description length of the new translation model with respect to a semantically-equivalent program refactoring without inducing  $\mathbb{P}_{\mathcal{T}}[w|l]$  from scratch (which would require retraining the full translation model over the sentences and refactored programs.)

## S6. Experiments

This section describes additional details on each of the domains – *string editing*, *compositional graphics*, and *scene understanding* – in Section 6 of the main paper (see **Figure 2, main text** for examples from all three domains, shown along with the synthetic and human language annotations). We also provide additional details on the model and baseline hyperparameters available for each domain. All datasets generated for these experiments (including human language annotations) are released and links to static repositories are provided in the code release. We also release a complete set of commands to exactly replicate all model experiments.

All experiments were conducted on a high-powered computing cluster using a fixed training budget of wall-clock search time per task for all models and baselines in a given domain (determined via hyperparameter search using the baseline model per domain, and reported on a per-domain basis below). The experiments on the string editing and graphics domains used models trained using 48 CPUs for search (using the original parallel enumerative search implemented in the released code for the DreamCoder model in (Ellis et al., 2021)); and the experiments trained on the scene reasoning task used 24 CPUs (as preliminary experiments revealed that these experiments required shorter search time for our main model, and we wished to reduce the carbon footprint of the remaining experiments after our first two domains.)

For all experiments we train the neural models for  $1 \times 10^4$  gradient steps. For experiments with language-guided compression, we use an upper bound of 5 new abstractions introduced per iteration. For mutual exclusivity experiments, we set  $\alpha_{ME} = 0.1$ . For all experiments, during program-only compression (see (Ellis et al., 2021) for a discussion of program-only compression hyperparameters) we use the hyperparameters from (Ellis et al., 2021) for parsimony with earlier work: a structure penalty of 1.5 and pseudocounts = 30.

## S6.1 Domains

(See **Figure 2**, main text for examples from all three domains, shown along with the synthetic and human language annotations.) As discussed in the main paper, each domain consists of a dataset of *tasks*; a set of procedurally generated *synthetic language annotations*; and a set of *human language annotations* provided by Mechanical Turk workers; we also described the *base primitives*  $\mathcal{L}_0$  with which all models (including baselines and ablations) were initialized for each domain.

### S6.1.1 STRING EDITING

**Tasks:** structured string transformation problems taken from a publicly released dataset in (Andreas et al., 2017) (n=1000 train; n=500 test). Tasks consist of input dictionary strings transformed using randomly sampled regular expression transducer (n=30 examples per task). Transducers were sampled according to abstract templates defined in (Andreas et al., 2017) and required identifying matched sequences of characters and *adding* letters before them; *removing* sequences; *replacing* them with new sequences, or *doubling* the sequence each time they appeared (See **Figure 2A**, main text).

**Language data:** The human language dataset for this domain was previously collected by (Andreas et al., 2017). We defined a synthetic grammar of high-level templates over the ground truth regular expression transducers (corresponding to the original templates used to generate the tasks.) The synthetic templates were defined based on language from the original human annotations, and in most cases closely matched the true human provided annotations (which were generally quite structured), though with significantly less variation (the original language contained multiple human descriptions per task. We generate a single synthetic for each one. The synthetic dataset has a vocabulary size of n=44 for both train and test. We use the human annotations in the original dataset when evaluating on human data, which have a vocabulary of n=727 (train) and n=622 (test).) We generate a synthetic dataset on this domain partly because of inaccuracies noted in (Andreas et al., 2017). The released code contains the complete generation procedure for these synthetic annotations. See Figure 2A for representative tasks with examples, synthetic language, and human descriptions.

**Initial program primitives:** We initialize all models with a set  $\mathcal{L}_0$  of LISP-like primitives that operate over substring sequences to both construct regular expression match sequences and manipulate strings, augmented with three text manipulation-specific primitives intended for executing constructed regular expression sequences;  $t$  is a polymorphic type variable using standard Hindley-Milner polymorphism typing (Pierce, 2002). The execution engine does include

a regex-matching model; however, the synthesis model is naive to this execution engine and simply searches for manipulations over the input strings and the regexes as data arrays.

$\mathcal{L}_0$  contains 14 substring manipulation primitives, given below with type information. We also give a semantic gloss for primitives that are not standard LISP primitives.

- `if (bool  $\rightarrow$  t  $\rightarrow$  t  $\rightarrow$  t)`
- `cons (t  $\rightarrow$  list(t)  $\rightarrow$  list(t))`
- `car (list(t)  $\rightarrow$  t)`
- `cdr list(t)  $\rightarrow$  list(t)`
- `map ((t0  $\rightarrow$  t1)  $\rightarrow$  list(t0)  $\rightarrow$  list(t1))`
- `tail (list(t)  $\rightarrow$  t)`
- `append (t  $\rightarrow$  list(t)  $\rightarrow$  list(t))`  
Appends element to end of list.
- `revcdr (list(t)  $\rightarrow$  list(t))`  
Takes all except the last element of the list.
- `match (substr  $\rightarrow$  substr  $\rightarrow$  bool)`  
Returns true if the first argument, when executed as a regular expression, matches the second argument.
- `regexsplit (substr  $\rightarrow$  fullstr  $\rightarrow$  list(substr))`  
Attempts to execute the first argument as a regular expression, and splits the second argument into a list of substrings, using the regular expression match as a delimiter (and includes the matched sequences in the returned list.)
- `flatten (list(substr)  $\rightarrow$  fullstr)`  
Flattens a list of substrings back into a string.
- `rconcat (substr  $\rightarrow$  substr  $\rightarrow$  substr)`  
Concatenates two substrings.
- `rnot (substr  $\rightarrow$  substr)`  
Takes a substring argument  $s$  and returns the substring literal  $[\hat{s}]$
- `ror (substr  $\rightarrow$  substr  $\rightarrow$  substr)`  
Takes substring literals  $a$  and  $b$  and returns the substring literal  $((a)\text{---}(b))$

We also include 26 character constants of type `substr` and constants `dot` (regular expression wildcard character) and `empty` (empty string).

**Domain hyperparameters** We largely follow prior work (Ellis et al., 2021) to set algorithm training parameters; the

earlier (Ellis et al., 2021) uses a 720s enumerative search budget for solving both text editing and general list manipulation tasks. We use the same 720s enumerative budget here.

The encoder  $E(t)$  follows the domain-specific encoder used for text and list editing problems in (Ellis et al., 2021), a 2-layer GRU with 64 hidden units. The model is trained for a fixed gradient step budget (10,000 gradient steps) and we sample equally at random between supervision on the solved training tasks (and their solution programs in the current DSL) and samples from the joint generative model. As with (Ellis et al., 2021), when generating tasks from the generative model, we use randomly sample inputs (on which we execute generated programs to produce an output.)

### S6.1.2 COMPOSITIONAL GRAPHICS

**Tasks:** inverse graphics problems ( $n=200$  train;  $n=111$  test) where each synthesis problem is specified by an image and solved by synthesizing a program in LOGO Turtle graphics (Abelson & DiSessa, 1986). The domain is inspired by the graphics domain in (Ellis et al., 2021) but intentionally re-designed to be much more challenging (ground-truth programs are much longer on average in the base programming language) and explicitly compositional: the training and testing tasks contain *simple shape tasks* defined by compositional parameters for a set of basic shapes (*a small triangle, a medium square; a small semicircle*); *complex shape tasks* that require inferring more challenging (and longer) parameterized shapes (*a greek spiral with eight turns*); and *compositional tasks* defined by geometric rules and relations over the simple shapes (*a seven sided snowflake with a short line and a small triangle as arms; a small triangle connected by a big space from a small circle*) (See **Figure 2C**).

**Simple parameterized shapes** are either polygons (*triangle, square, [n] gon*), curves (*semicircle, circle*) or *lines*. Simple shapes are parameterized by one of three sizes (*small or short; medium; and big*). When generating synthetic language descriptions, pluralized objects are tokenized with separate tokens for the noun lemma and a token for the plural suffix (e.g. *square s*).

**Complex parameterized shapes** require constructing more complex images out of basic lines, and are intended to evaluate performance on tasks that pose a greater search challenge in the initial DSL, and whose structure is not directly cued by compositional relationships over easier components. Further, the complex shapes can be solved using abstractions (e.g. for repeatedly rotating a pen at right angles) that are not directly cued by shared lexical names – we evaluate the algorithm’s ability to learn and use abstractions that correspond to useful sublexical structures shared across multiple lexemes. We define four template families for complex shapes: *spirals, staircases, zigzags, and stars*.

**Compositional graphics** tasks invoke compositional relationships over the simple parameterized shapes. We define templates for generating 6 families of compositional tasks: *nested, next to, separated by, connected by, in a row, and snowflakes*.

**Language data:** We gather human language annotations by asking Mechanical Turk workers to write an image description for the rendered graphics images that specify each task. Each worker labeled 20 training and 10 testing images after viewing a disjoint, randomly sampled set of 15 example images paired with their synthetic language captions. (Workers were asked to write a *short, clear description that a person or robot could use to recreate the picture*, and told that the examples were paired with *automatically generated captions as an example of the kinds of descriptions you could write for this picture*.) We control for description quality by requiring workers to complete a reference task on their own descriptions: after writing their initial annotations, workers were required to correctly match each annotation to the target image (from amidst a set of 12 distractors drawn heuristically from similar images on the full task dataset, and other images they themselves had described), and only annotations correctly matched to the target image were retained (workers were given a chance to redescribe pictures they failed to match to their own captions.) We preprocess the human dataset minimally to standardize number terms (e.g. we use the same token type for both 3 and *three*) and to split plurals into a lemma and suffix, as in the synthetic dataset. The final dataset has a vocabulary size of  $n=562$  for both train and test.

As with the string editing domain, we define a synthetic dataset using parameterized templates based on systematic language reused in the human annotations (see Figure 2A for a comparison between human annotations and synthetic language); as with that domain, we choose a synthetic dataset to ensure systematic re-use of high level terms for repeated compositional objects (such as the “n-gon” or “snowflake” terminology.)

We then generate graphics tasks by defining parameterized templates over ground truth programs in  $\mathcal{L}_0$ , and a corresponding generator for synthesizing natural language descriptions based on each ground truth program. It is important to note that the templates are defined at any extremely high level and were written with respect to low-level programs in a simple graphics language (many of which were derived by generalizing compositionally over complex structures in (Ellis et al., 2021), such as the ‘snowflake’ images).

**Initial program primitives:** For comparison with prior work, our initial library on this domain (and the base language used to generate the ground truth graphics programs) is an implementation of the LOGO Graphics DSL used in (Ellis et al., 2021), which consists of four typed, impera-

385 tive primitives modeled within the  $\lambda$ -calculus with a state  
386 monad  $S$ :

387  
388  
389 `move: distance  $\rightarrow$  angle  $\rightarrow$   $S \rightarrow S$`   
390 `pen-up: ( $S \rightarrow S$ )  $\rightarrow$   $S \rightarrow S$`   
391 `for: int  $\rightarrow$  ( $S \rightarrow S$ )  $\rightarrow$   $S \rightarrow S$`   
392 `get/set: ( $S \rightarrow S$ )  $\rightarrow$   $S \rightarrow S$`   
393

394  
395  
396 as well as four arithmetic operators (+, -, \*, /), integer  
397 constants (1-9), unit distances and angles (1 meter and  $2\pi$   
398 radians), and special values  $\infty$  and  $\epsilon$ .

399 Figure 3 (main text) shows examples of the graphics tasks,  
400 synthetic descriptions, human descriptions, and sample pro-  
401 grams in the ground truth initial DSL.  
402

403 **Domain hyperparameters** We largely follow prior work  
404 (Ellis et al., 2021) to set algorithm training parameters. Con-  
405 sistent with the graphics program experiments in (Ellis et al.,  
406 2021), we train all models, including baselines and abla-  
407 tions, using an enumerative search budget of 1800s per task  
408 (both when using pure enumerative search from the DSL  
409 prior, and neurally-guided search conditioned on the task  
410 examples and language descriptions); the results in Table  
411 1 compare the relative advantage of our model given this  
412 fixed search time. We train all models on 48 CPUs dur-  
413 ing parallel enumerative search, and run the algorithm for  
414 a maximum of 27 iterations (see learning curves. As we  
415 run multiple random seed replications of models in this do-  
416 main, we tuned the iteration limit based on performance on  
417 the first replication, allowing models to train while  
418 performance continued to increase. To conserve computa-  
419 tional resources, we later stopped several of our own model  
420 replications before 27 iterations, as they had reached near  
421 ceiling performance. As we report the best held-out test  
422 score across all 27 iterations for any one model, the early  
423 stopping would only serve to give a conservative estimate  
424 on performance for these models.) We randomly reorder the  
425 training set of tasks once before the first loop, then iterate  
426 through batches of  $n=40$  tasks at each iteration; learning  
427 curves show results from evaluating on held-out tasks every  
428  $n=3$  iterations.

429 The encoder  $E(t)$  follows the domain-specific encoder used  
430 for the original graphics domain in (Ellis et al., 2021) for  
431 a more direct comparison: we use a 6-layer CNN, where  
432 each layer consists of a  $64 \times 64$  2D convolutional sublayer  
433 with kernel size = 3, a RELU activation sublayer, and a max-  
434 pooling sublayer with kernel size = 2. The model is trained  
435 for a fixed gradient step budget (10,000 gradient steps) and  
436 we sample equally at random between supervision on the  
437 solved training tasks (and their solution programs in the  
438 current DSL) and samples from the joint generative model.  
439

### S6.1.3 SCENE REASONING

**Tasks:** inductive scene reasoning tasks ( $n=212$  train;  $n=115$   
test) where each synthesis problem is specified by a struc-  
tured input scene, and outputs can be a number (*how many  
red rubber things are there?*), a boolean value (*are there  
more blue things than green things?*), or another scene (*what  
if all of the red things turned blue?*). This domain is modeled  
on CLEVR (Johnson et al., 2017) but designed to support  
non-linguistic, inductive synthesis in the programming-by-  
example paradigm: each task is specified with  $n=7$  paired  
input output examples. See **Figure 2B, main text** for exam-  
ple tasks showcasing the original and extended templates,  
synthetic language annotations, and human language anno-  
tations.

The dataset includes questions randomly generated from the  
following subset of the *original CLEVR question templates*  
(see (Johnson et al., 2017) for additional details on the task  
generation process and question templates; we also release  
our own augmented question generation code and the full  
dataset):

- **zero\_hop:** questions that require counting or answer-  
ing an attribute query about a subset of objects in the  
scene. (e.g. *How many small cylinders are there?*;  
*What material is the purple thing?*).
- **one\_hop:** questions similar to the *zero\_hop* tasks, but  
that require reasoning over an additional relational  
query (e.g. *What number of things are right the small  
gray thing?*).
- **single\_or:** questions that additionally introduce a *dis-*  
*junction* between sets of objects. (e.g. *How many  
objects are either large metal spheres or large rubber  
things?*).
- **(compare\_integer:** questions that additionally intro-  
duce a  $\geq$  or  $\leq$  operator between counts of sets of ob-  
jects. (e.g. *Is the number of large rubber cubes less  
than the number of large green rubber things?*)
- **same\_relate:** questions that additionally require rea-  
soning about other objects with the same attribute as  
a specified object. (e.g. *How many other things are  
there of the same size as the cyan thing?*).

We choose these templates as a representative subset of  
the style of the full CLEVR dataset, that requires the full  
language of high-level primitives in (Johnson et al., 2017)  
to solve. We omit some longer questions in the same format  
(e.g. *two\_hop*) as our intention is to compare synthesis  
baselines, rather than to achieve SOTA performance on  
CLEVR: this would likely only increase the computing  
resources needed to compare the various methods and we



already found a significant differential between our model and the baselines on the shorter questions.)

We also add *new* question templates generated in the style of the original CLEVR tasks, but designed to model other common AI tasks (such as generating new scenes based on existing ones) and to require new abstractions (that were not expressible in the original restricted symbolic language used to generate scenes in (Johnson et al., 2017)):

- **localization:** questions for object localization. These return an output *scene* consisting of a localized set of objects based on a set of query attributes (e.g. *Find the gray rubber thing.*).
- **remove:** questions that either return an output *scene* with a subset of the objects removed, or that query about latent scenes where a subset of objects has been removed. (e.g. *What if you removed all of the gray metal things?; If you removed the green cubes, how many cubes would be left?*).
- **transform:** questions that either return an output *scene* where a subset of the objects has been *transformed* to set new attributes, or that query about latent scenes where a subset of objects has been modified this way. (e.g. *What if all the blue metal things became rubber things?; If all of the large yellow rubber things became gray spheres, how many gray spheres would there be?*).

We treat these as program synthesis tasks: the input scenes are specified as *symbolic scene graphs consisting of an array of structured, objects defined as a dictionary of their attributes*, and programs are designed to manipulate these structured arrays (this data structure is the original format in which scenes themselves are generated in (Johnson et al., 2017)); the images displayed in Figure 3, main text are rendered using the original image rendering pipeline). Our intention is *not* to build a visual reasoning architecture: rather, we are interested in learning structured manipulations of scenes. We see work in *inverse graphics* (such as (Yi et al., 2018)) which outputs a structured scene graph based on pixel images as the *first* step in a symbolic processing and reasoning pipeline as analogous; we are interested in the structured manipulation of these scene representations.

**Language data:** Synthetic language annotations are generated based on the original high-level templates in (Johnson et al., 2017), as well as additional templates we define for the extended questions in the same style. We gather human language annotations by asking Mechanical Turk workers to write an instruction or question describing the set of inductive examples. However, due to the difficulty of solving certain tasks in a limited time frame based on the inductive examples alone (such as the questions about disjunctions

over scenes), we show Mechanical Turk workers the synthetic descriptions for this domain and ask them to write a semantically similar description that changes more than one word in the original caption, and that would be "more natural for a human to understand". This paraphrasing paradigm is similar to that used in (Wang et al., 2015), though we find that in comparison to other domains it generates less diverse language data.) We remove all punctuation, tokenize on spaces, and use an additional domain heuristic to stem all plurals (e.g. *cubes*).

**Initial program primitives:** We initialize all models with a set  $\mathcal{L}_0$  of LISP-like primitives. These are similar to the initial list manipulation primitives used in the *string editing* domain: as both domains can be treated as manipulating structured arrays, we are interested in learning differentiated, domain-specific abstractions based on a very similar base language.  $\mathcal{L}_0$  also includes primitives for querying attributes of objects on the domain (these are typed getters that simply query the object dictionary of attributes) and several domain-specific functions necessary for manipulating these attribute. We deliberately use a much more base level programming language than the high-level, domain-specific language hand-designed in (Johnson et al., 2017); our goal is to *learn* the necessary abstractions.

We give a semantic gloss for primitives that are not standard LISP primitives.

- `if (bool  $\rightarrow$  t  $\rightarrow$  t  $\rightarrow$  t)`
- `cons (object  $\rightarrow$  list(object)  $\rightarrow$  list(object))`
- `car (list(object)  $\rightarrow$  object)`
- `map ((t0  $\rightarrow$  t1)  $\rightarrow$  list(t0)  $\rightarrow$  list(t1))`
- `fold ((list(t)  $\rightarrow$  list(t))  $\rightarrow$  (t  $\rightarrow$  list(t)  $\rightarrow$  list(t))  $\rightarrow$  list(t))`
- `len (list(t)  $\rightarrow$  int)`
- `> (list(t)  $\rightarrow$  bool)`
- `< (list(t)  $\rightarrow$  bool)`
- `set_union (list(t)  $\rightarrow$  list(t)  $\rightarrow$  list(t))`
- `set_intersect (list(t)  $\rightarrow$  list(t)  $\rightarrow$  list(t))`
- `set_difference (list(t)  $\rightarrow$  list(t)  $\rightarrow$  list(t))`
- `relate (object  $\rightarrow$  relation  $\rightarrow$  list(t))` Returns an array of objects that satisfy a spatial relation with respect to an input object.

We also include *equality* comparators for each of the attribute types (e.g. `eq_color?`; *getters* for each attribute, and *setters* for each attribute. We also include integer constants 0-9 for counting and constants for the attributes (`blue`, `red`, `big`, `small`, `rubber`, `metal`) based on the original object and spatial relation constants (Johnson et al., 2017).

**Domain hyperparameters:** We run a coarse hyperparameter search based on the baseline model to set the domain hyperparameters. We train all models, including baselines and ablations, using an enumerative search budget of 1000s per task and run the models for a maximum of 5 iterations. we run multiple random seed replications reordering the training set, in the same way as the compositional graphics domain. The results in Table 1 also compare a *curriculum* ordering of the training set based on the number of tokens in the synthetic language captions (split on spaces.)

The encoder E(t) is a variant of the RNN-based domain-specific encoder used for text and list editing problems in (Ellis et al., 2021) (as well as the string editing domain). The model is trained for a fixed gradient step budget (10,000 gradient steps) and we sample equally at random between supervision on the solved training tasks (and their solution programs in the current DSL) and samples from the joint generative model. As with (Ellis et al., 2021), when generating tasks from the generative model, we use randomly sample inputs (on which we execute generated programs to produce an output.) We encode the symbolic scene data structures with the RNN by encoding a flattened version of the scene graph. The scene graph is originally stored as a dictionary of attributes; when flattened, we indicate the dictionary structure using special tokens to denote the keys and the start and end of any array delimiters (the original scene graph is fully reconstructable from the flattened version.)

## S 6.2 Results and Additional Qualitative Results

In this section, we discuss additional qualitative results from an in depth exploration of the graphics domain that were omitted from the main paper for space, but provide additional insight on the behavior of the learned model in the hardest learning domain (based on the differential between baseline and LAPS-augmented performance.)

**Learned abstractions and synthesized programs.** Figure S4 (supplement) show sample abstractions in the final libraries  $\mathcal{L}_f$  for the best performing models in the graphics domain as a concrete exemplar of abstractions that are learned and how they are used, along with sample tasks solved with these abstractions. The figures are shown as dependency graphs to indicate how progressively more complex abstractions *build* on abstractions at prior iterations of learning; we also show selected probabilities from the translation model (depicted are examples from the top-3

primitive translations for a given word; some primitives are not high probability translations for any word.)

**Joint generative model samples.** Figure S3 (supplement) shows samples from the joint generative model on the graphics domain (programs from the library which are executed to produce the task example image, and translated to produce language annotations) at early and later stages of training, indicating that the joint model itself improves as learning improves, which itself allows better training for the conditional inference model and better abstraction guiding based on language.

## References

- Abelson, H. and DiSessa, A. A. *Turtle geometry: The computer as a medium for exploring mathematics*. MIT press, 1986.
- Andreas, J., Vlachos, A., and Clark, S. Semantic parsing as machine translation. In *Proceedings of the 51st Annual Meeting of the Association for Computational Linguistics (Volume 2: Short Papers)*, pp. 47–52, 2013.
- Andreas, J., Klein, D., and Levine, S. Learning with latent language. *arXiv preprint arXiv:1711.00482*, 2017.
- Artzi, Y., Das, D., and Petrov, S. Learning compact lexicons for ccg semantic parsing. 2014.
- Balog, M., Gaunt, A. L., Brockschmidt, M., Nowozin, S., and Tarlow, D. Deepcoder: Learning to write programs. *arXiv preprint arXiv:1611.01989*, 2016.
- Cho, K., Van Merriënboer, B., Gulcehre, C., Bahdanau, D., Bougares, F., Schwenk, H., and Bengio, Y. Learning phrase representations using rnn encoder-decoder for statistical machine translation. *arXiv preprint arXiv:1406.1078*, 2014.
- Dechter, E., Malmaud, J., Adams, R. P., and Tenenbaum, J. B. Bootstrap learning via modular concept discovery. In *Twenty-Third International Joint Conference on Artificial Intelligence*, 2013.
- Devlin, J., Uesato, J., Bhupatiraju, S., Singh, R., Mohamed, A.-r., and Kohli, P. Robustfill: Neural program learning under noisy i/o. In *Proceedings of the 34th International Conference on Machine Learning-Volume 70*, pp. 990–998. JMLR. org, 2017.
- Dumancić, S. and Cropper, A. Inventing abstractions by refactoring knowledge.
- Ellis, K., Morales, L., Sablé-Meyer, M., Solar-Lezama, A., and Tenenbaum, J. Learning libraries of subroutines for neurally-guided bayesian program induction. In *Advances in Neural Information Processing Systems*, pp. 7805–7815, 2018.

550  
551  
552  
553  
554  
555  
556  
557  
558  
559  
560  
561  
562  
563  
564  
565  
566  
567  
568  
569  
570  
571  
572  
573  
574  
575  
576  
577  
578  
579  
580  
581  
582  
583  
584  
585  
586  
587  
588  
589  
590  
591  
592  
593  
594  
595  
596  
597  
598  
599  
600  
601  
602  
603  
604

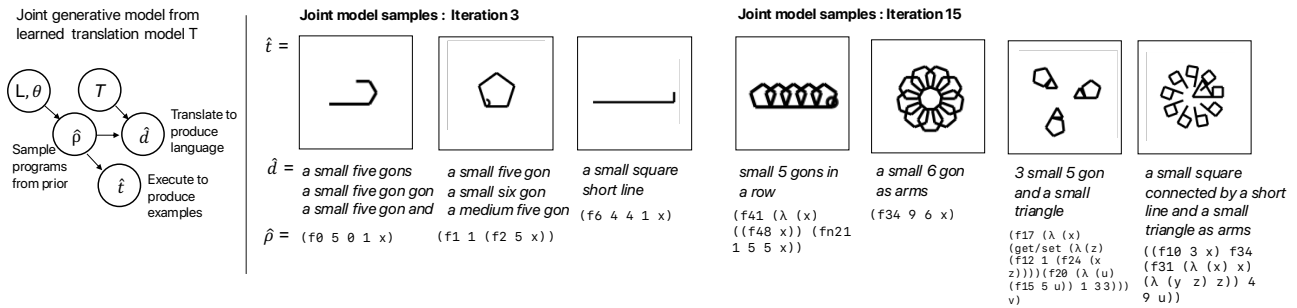

Figure 3. (left) Joint generative model  $J$  over programs sampled from the DSL prior and natural language produced by the translation model  $T(D|\mathcal{L})$ , inferred from solved training tasks. Samples from the model are used to train a neural synthesizer to guide search on more challenging, unsolved tasks. (right) Samples from the  $J$  generative model in the graphics domain shows how program complexity increases and generated language improves across iterations, as the system both adds richer abstractions to the DSL and learns better alignments over the solution set, enabling the trained neural model to solve more complex tasks

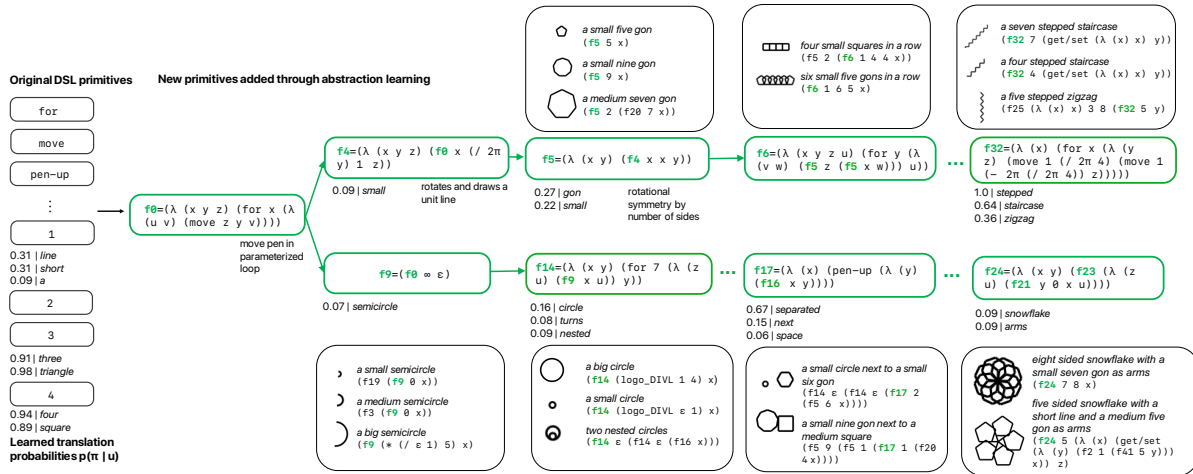

Figure 4. Abstractions and programs learned for the graphics domain. Sample abstractions (right) learned from a minimal starting DSL (left) for solving progressively more complex graphics program synthesis tasks with language annotations. Also shown with translation probabilities. Our iterative algorithm learns alignment-based translation probabilities between natural language words and program primitives to guide program search and abstraction (depicted are examples from the top-3 primitive translations for a given word; some primitives are not high probability translations for any word).

- 605 Ellis, K., Wong, C., Nye, M., Sablé-Meyer, M., Cary, L.,  
606 Morales, L., Hewitt, L., Solar-Lezama, A., and Tenen-  
607 baum, J. Dreamcoder: Bootstrapping inductive program-  
608 synthesis with wake-sleep library learning. *PLDI 2021*,  
609 2021.
- 610 Frank, M. C., Goodman, N. D., and Tenenbaum, J. B. Us-  
611 ing speakers' referential intentions to model early cross-  
612 situational word learning. *Psychological science*, 20(5):  
613 578–585, 2009.
- 614 Gal, Y. and Blunsom, P. A systematic bayesian treatment  
615 of the ibm alignment models. In *Proceedings of the 2013*  
616 *Conference of the North American Chapter of the Associ-*  
617 *ation for Computational Linguistics: Human Language*  
618 *Technologies*, pp. 969–977, 2013.
- 619 Gandhi, K. and Lake, B. M. Mutual exclusivity as a  
620 challenge for deep neural networks. *arXiv preprint*  
621 *arXiv:1906.10197*, 2019.
- 622 Heafield, K. Kenlm: Faster and smaller language model  
623 queries. In *Proceedings of the sixth workshop on statisti-*  
624 *cal machine translation*, pp. 187–197. Association for  
625 Computational Linguistics, 2011.
- 626 Johnson, J., Hariharan, B., Van Der Maaten, L., Hoffman,  
627 J., Fei-Fei, L., Lawrence Zitnick, C., and Girshick, R.  
628 Inferring and executing programs for visual reasoning.  
629 In *Proceedings of the IEEE International Conference on*  
630 *Computer Vision*, pp. 2989–2998, 2017.
- 631 Koehn, P., Hoang, H., Birch, A., Callison-Burch, C., Fed-  
632 erico, M., Bertoldi, N., Cowan, B., Shen, W., Moran, C.,  
633 Zens, R., et al. Moses: Open source toolkit for statistical  
634 machine translation. In *Proceedings of the 45th annual*  
635 *meeting of the association for computational linguistics*  
636 *companion volume proceedings of the demo and poster*  
637 *sessions*, pp. 177–180, 2007.
- 638 Lake, B. M., Salakhutdinov, R. R., and Tenenbaum, J. One-  
639 shot learning by inverting a compositional causal process.  
640 In *Advances in neural information processing systems*,  
641 pp. 2526–2534, 2013.
- 642 Lake, B. M., Salakhutdinov, R., and Tenenbaum, J. B.  
643 Human-level concept learning through probabilistic pro-  
644 gram induction. *Science*, 350(6266):1332–1338, 2015.
- 645 Liang, P., Jordan, M. I., and Klein, D. Learning programs:  
646 A hierarchical bayesian approach. In *Proceedings of*  
647 *the 27th International Conference on Machine Learning*  
648 *(ICML-10)*, pp. 639–646, 2010.
- 649 Markman, E. M. and Wachtel, G. F. Children's use of mutual  
650 exclusivity to constrain the meanings of words. *Cognitive*  
651 *psychology*, 20(2):121–157, 1988.
- 652 Nye, M., Hewitt, L., Tenenbaum, J., and Solar-Lezama,  
653 A. Learning to infer program sketches. *arXiv preprint*  
654 *arXiv:1902.06349*, 2019.
- 655 Parisotto, E., Mohamed, A.-r., Singh, R., Li, L., Zhou, D.,  
656 and Kohli, P. Neuro-symbolic program synthesis. *arXiv*  
657 *preprint arXiv:1611.01855*, 2016.
- 658 Pierce, B. C. *Types and programming languages*. MIT  
659 Press, 2002. ISBN 978-0-262-16209-8.
- 660 Polosukhin, I. and Skidanov, A. Neural program search:  
661 Solving data processing tasks from description and exam-  
662 ples. 2018.
- 663 Shin, E. C., Allamanis, M., Brockschmidt, M., and Polo-  
664 zov, A. Program synthesis and semantic parsing with  
665 learned code idioms. In *Advances in Neural Information*  
666 *Processing Systems*, pp. 10824–10834, 2019.
- 667 Wang, Y., Berant, J., and Liang, P. Building a semantic  
668 parser overnight. In *Proceedings of the 53rd Annual*  
669 *Meeting of the Association for Computational Linguistics*  
670 *and the 7th International Joint Conference on Natural*  
671 *Language Processing (Volume 1: Long Papers)*, pp. 1332–  
672 1342, 2015.
- 673 Wong, Y. W. and Mooney, R. J. Learning for semantic pars-  
674 ing with statistical machine translation. In *Proceedings*  
675 *of the main conference on Human Language Technol-*  
676 *ogy Conference of the North American Chapter of the*  
677 *Association of Computational Linguistics*, pp. 439–446.  
678 Association for Computational Linguistics, 2006.
- 679 Yi, K., Wu, J., Gan, C., Torralba, A., Kohli, P., and Tenen-  
680 baum, J. Neural-symbolic vqa: Disentangling reasoning  
681 from vision and language understanding. In *Advances in*  
682 *Neural Information Processing Systems*, pp. 1031–1042,  
683 2018.
- 684 Zhang, Y., Pasupat, P., and Liang, P. Macro grammars and  
685 holistic triggering for efficient semantic parsing. *arXiv*  
686 *preprint arXiv:1707.07806*, 2017.
